# Supplementary material
Source: HighWire-hosted journal article supplement (http://rc.rcjournal.com/highwire/filestream/27305/field_highwire_adjunct_files/0/rc-11077-File001.docx)
Supplement: rc-11077-File001.docx [file rc-11077-File001.docx]

**Supplemental Table 1.** Checklist for eligibility for weaning from the ventilator, eligibility for SBT and identification of SBT failure criteria.

| **Identification number** | **Intubation date** | | | | | | | **Extubation date** | | | | | **Reintubation date** | | | | | | | | | **Tracheostomy?** | | | | | | | |
| --- | --- | --- | --- | --- | --- | --- | --- | --- | --- | --- | --- | --- | --- | --- | --- | --- | --- | --- | --- | --- | --- | --- | --- | --- | --- | --- | --- | --- | --- |
| Hour | | | | | | | Hour | | | | | Hour | | | | | | | | |  | | | | | | | |
| **Checklist for assessing readiness to wean** | | | | | | | | | | | | | | | | | | | | | | | | | | | | | |
| **Is the patient suitable for ventilatory weaning? (Everyone below must be present)** | | | | | | | | | | | | | | | | | | | | | | | | | | | | | |
| FiO2 ≤ 0.4 and SaO2 ≥ 92% |  | |  | |  |  | |  | |  |  |  |  |  | | | |  | | |  |  | | |  |  | |  |  |
| PEEP ≤ 8 cmH2O |  | |  | |  |  | |  | |  |  |  |  |  | | | |  | | |  |  | | |  |  | |  |  |
| **Suitable for spontaneous breathing trial? (Everyone below must be present)** | | | | | | | | | | | | | | | | | | | | | | | | | | | | | |
| Effective cough (peak flow > 60l or positive white card) |  |  | |  | | |  |  |  | |  |  |  |  | | |  | | |  | |  | |  | | |  |  |  |
| No sedation or minimal doses of sedatives |  |  | |  | | |  |  |  | |  |  |  |  | | |  | | |  | |  | |  | | |  |  |  |
| No vasopressors or minimal doses of vasopressors |  |  | |  | | |  |  |  | |  |  |  |  | | |  | | |  | |  | |  | | |  |  |  |
| Ability to obey commands |  |  | |  | | |  |  |  | |  |  |  |  | | |  | | |  | |  | |  | | |  |  |  |
| No surgical schedule for the next 24 hours |  |  | |  | | |  |  |  | |  |  |  |  | | |  | | |  | |  | |  | | |  |  |  |
| Does the intensivist agree with the SBT? |  |  | |  | | |  |  |  | |  |  |  |  | | |  | | |  | |  | |  | | |  |  |  |
| **If YES for the two steps above, start SBT for 30 minutes to 2 hours** | | | | | | | | | | | | | | | | | | | | | | | | | | | | | |
| Note the time spent in SBT |  |  | |  | | |  |  |  | |  |  |  | |  |  | | |  | | |  |  | | |  | |  |  |
| **Failure criteria of spontaneous breathing trials. After SBT, does the patient have any of the sign below?** | | | | | | | | | | | | | | | | | | | | | | | | | | | | | |
| RR ≥ 35 breaths per minute |  |  | |  | | |  |  |  | |  |  |  | |  |  | | |  | | |  |  | | |  | |  |  |
| Diaphoresis |  |  | |  | | |  |  |  | |  |  |  | |  |  | | |  | | |  |  | | |  | |  |  |
| Increased accessory muscle activity |  |  | |  | | |  |  |  | |  |  |  | |  |  | | |  | | |  |  | | |  | |  |  |
| Paradoxical breathing movements |  |  | |  | | |  |  |  | |  |  |  | |  |  | | |  | | |  |  | | |  | |  |  |
| SpO2 < 92% |  |  | |  | | |  |  |  | |  |  |  | |  |  | | |  | | |  |  | | |  | |  |  |
| HR > 140 beats per minute or increased by ≥ 20% |  |  | |  | | |  |  |  | |  |  |  | |  |  | | |  | | |  |  | | |  | |  |  |
| Systolic BP > 180 mmHg or increased by ≥ 20% |  |  | |  | | |  |  |  | |  |  |  | |  |  | | |  | | |  |  | | |  | |  |  |
| Depressed mental status |  |  | |  | | |  |  |  | |  |  |  | |  |  | | |  | | |  |  | | |  | |  |  |
| Agitation and anxiety |  |  | |  | | |  |  |  | |  |  |  | |  |  | | |  | | |  |  | | |  | |  |  |
| **If YES on any of the above items, return to MV for rest** | | | | | | | | | | | | | | | | | | | | | | | | | | | | | |
| **In NOT, proceed with extubation** | | | | | | | | | | | | | | | | | | | | | | | | | | | | | |
| DE group |  |  | |  | | |  |  |  | |  |  |  | |  |  | | |  | | |  |  | | |  | |  |  |
| R1h group |  |  | |  | | |  |  |  | |  |  |  | |  |  | | |  | | |  |  | | |  | |  |  |
| **Was de patient extubated?** |  |  | |  | | |  |  |  | |  |  |  | |  |  | | |  | | |  |  | | |  | |  |  |
| **Was the patient reintubated at < 48 hours?** |  |  | |  | | |  |  |  | |  |  |  | |  |  | | |  | | |  |  | | |  | |  |  |

SBT: spontaneous breathing trial; FiO2: inspired fraction of oxygen; PEEP: positive end-expiratory pressure; SpO2: peripheral oxygen saturation; RR: respiratory rate; HR: heart hate; BP: blood pressure; MV: mechanical ventilation; DE group: direct extubation group; R1h group: extubation after reconnection to mechanical ventilation for 1 hour group.
